# Supplementary material for: Multivalent polymer–Au nanocomposites with cationic surfaces displaying enhanced antimicrobial activity
Source: Royal Society of Chemistry journal article supplement (doi:10.1039/c3py01578e), 2014-01-01
Supplement: c3py01578e.pdf [file c3py01578e.pdf]

*Supplementary Information*

**Multivalent Polymer-Au Nanocomposites with cationic  
surfaces displaying enhanced antimicrobial activity**

Lin Mei, Xinge Zhang<sup>\*</sup>, Yanan Wang, Wei Zhang, Zhentan Lu, Yuting Luo, Yu Zhao and  
Chaoxing Li<sup>\*</sup>

Key Laboratory of Functional Polymer Materials of Ministry Education, Institute of  
Polymer Chemistry, Nankai University, Tianjin 300071, China

<sup>\*</sup>Corresponding author

Tel.: +86 22 23501645; fax: +86 22 23505598.

E-mail: zhangxinge@nankai.edu.cn (Xinge Zhang), lcx@nankai.edu.cn (Chaoxing  
Li).

## S1. FTIR assay

FTIR assay was used to further characterize the structural change of PDMAEMA, as shown in Fig. S1. The increased band intensities of C-H stretching ( $2924\text{ cm}^{-1}$ ) and C-N stretching ( $1151\text{ cm}^{-1}$ ) in the IR spectrum of PDMAEMA- $\text{C}_4$  suggested the successful conversion of the tertiary amines to quaternary amines. FTIR spectra can also confirm the possible group of PDMAEMA- $\text{C}_4$  linking to AuNPs. When compared with the spectrum of PDMAEMA- $\text{C}_4$ , the band of AuNPs@PDMAEMA- $\text{C}_4$  at  $616\text{ cm}^{-1}$  (C-S stretching) was vanished, indicating the binding of PDMAEMA- $\text{C}_4$  to AuNPs mainly generated via thiol group from the reduction of PDMAEMA- $\text{C}_4$ .<sup>S1</sup>

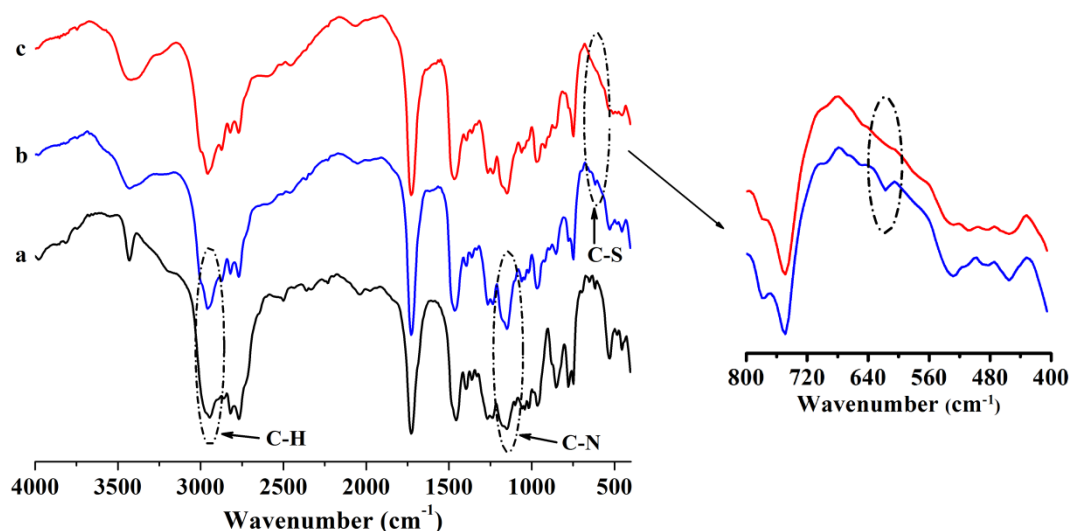

**Fig. S1.** FTIR spectra of PDMAEMA (a), PDMAEMA- $\text{C}_4$  (b) and AuNPs@PDMAEMA- $\text{C}_4$  (c).

## S2. TEM image

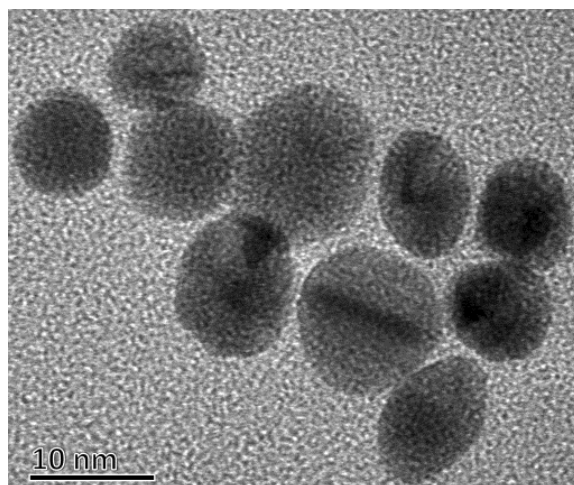

**Fig. S2.** TEM image of AuNPs@PDMAEMA-C<sub>4</sub>.

## References

- S1. A. B. Lowe, B. S. Sumerlin, M. S. Donovan and C. L. McCormick, *J Am Chem Soc.* 2002, **124**, 11562-31156.
